# Supplementary material for: Perceived Threat and Corroboration: Key Factors That Improve a Predictive Model of Trust in Internet-based Health Information and Advice
Source: PubMed Central journal article supplement (PMC3222185; doi:10.2196/jmir.1821), 2011-07-27
Supplement: jmir_v13i3e51_app1.pdf [file jmir_v13i3e51_app1.pdf]

**Multimedia Appendix 1: Zero-order Correlations among the measures not included in the final model together with their descriptive statistics**

|                               | <b>Worry</b>      | <b>Confused</b>   | <b>Reassured</b> | <b>Mean</b> | <b>Standard deviation</b> |
|-------------------------------|-------------------|-------------------|------------------|-------------|---------------------------|
| <b>Worry</b>                  |                   |                   |                  | 2.53        | 0.86                      |
| <b>Confused</b>               | .54 <sup>b</sup>  |                   |                  | 2.08        | 1.04                      |
| <b>Reassured</b>              | -.50 <sup>b</sup> | -.43 <sup>b</sup> |                  | 3.77        | 0.98                      |
| <b>Checked</b>                | .02               | -.08              | .11 <sup>a</sup> | 4.00        | 1.09                      |
| <b>Information quality</b>    | -.20 <sup>b</sup> | -.46 <sup>b</sup> | .32 <sup>b</sup> | 3.95        | 0.64                      |
| <b>Personalization</b>        | -.15 <sup>b</sup> | -.24 <sup>b</sup> | .18 <sup>b</sup> | 2.72        | 0.90                      |
| <b>Perceived impartiality</b> | -.12 <sup>b</sup> | -.33 <sup>b</sup> | .18 <sup>b</sup> | 3.72        | 0.82                      |
| <b>Credible design</b>        | -.10 <sup>a</sup> | -.20 <sup>b</sup> | .18 <sup>b</sup> | 3.41        | 0.84                      |
| <b>Coping</b>                 | -.51 <sup>b</sup> | -.52 <sup>b</sup> | .54 <sup>b</sup> | 3.73        | 1.02                      |
| <b>Threat</b>                 | -.00              | -.20 <sup>b</sup> | .12 <sup>a</sup> | 3.63        | 1.11                      |
| <b>Corroboration</b>          | -.14 <sup>b</sup> | -.24 <sup>b</sup> | .26 <sup>b</sup> | 3.44        | 1.76                      |
| <b>Outcomes</b>               |                   |                   |                  |             |                           |
| <b>Trust</b>                  | -.25 <sup>b</sup> | -.47 <sup>b</sup> | .33 <sup>b</sup> | 3.68        | 1.58                      |
| <b>Readiness to act</b>       | -.22 <sup>b</sup> | -.37 <sup>b</sup> | .30 <sup>b</sup> | 3.30        | 1.88                      |

<sup>a</sup>  $p < .05$ . <sup>b</sup>  $p < .01$ .

The range of each scale was the same as the scale points described in the procedure.
